# Supplementary material
Source: Springer Nature journal article supplement (https://www.springermedizin.de/resource/supplementary/12943_2002_8_MOESM2_ESM.pdf/9551694)

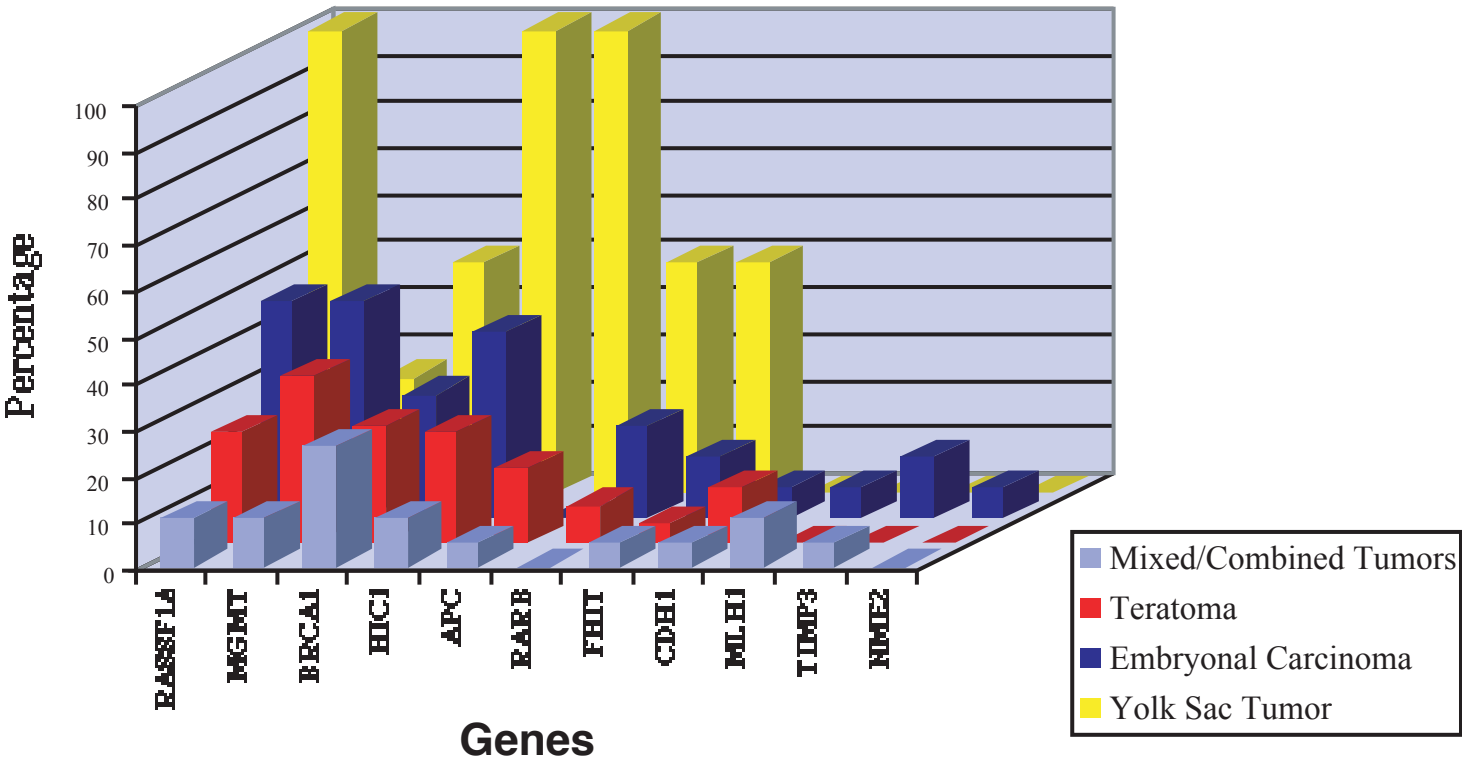

Supplement: MOESM2 [file 9551694]
